# Supplementary material for: mTOR is critical for intestinal T-cell homeostasis and resistance to Citrobacter rodentium
Source: PubMed Central journal article supplement (PMC5059740; doi:10.1038/srep34939), 2016-10-12
Supplement: srep34939-s1.pdf [file srep34939-s1.pdf]

## Supplementary Fig. S1

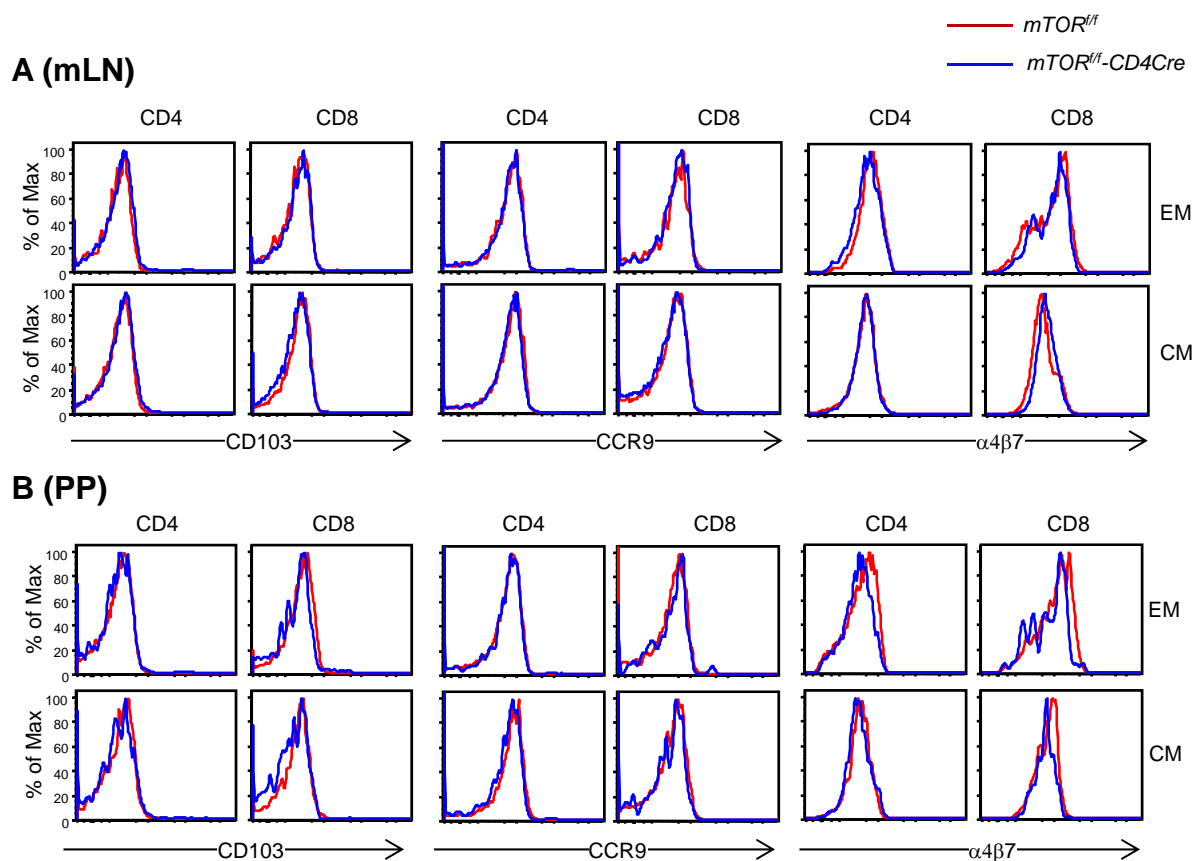

**Figure S1. Expression of gut-trophic molecules on effector CD4 and CD8 T cells in the mLNs and PPs in *mTOR<sup>fl/fl</sup>-CD4Cre* and *mTOR<sup>fl/fl</sup>* mice.** Overlaid histograms show CD103, CCR9, and integrin  $\alpha 4\beta 7$  staining in gated CD44<sup>+</sup>CD62L<sup>+</sup> (CM) and CD44<sup>+</sup>CD62L<sup>-</sup> (EM) CD4 and CD8 T cells. Data shown are representative of three experiments.

## Supplementary Fig. S2

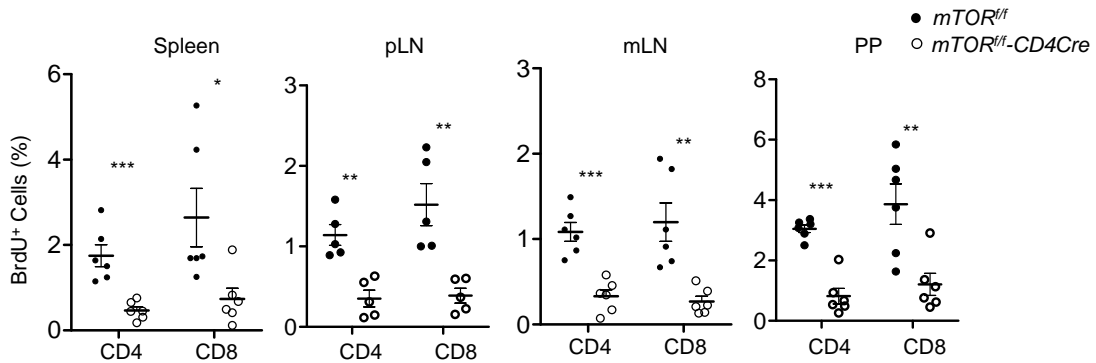

**Figure S2. BrdU incorporation in CD4 and CD8 T cells in the peripheral lymphoid organs from *mTOR<sup>ff</sup>-CD4Cre* and *mTOR<sup>ff</sup>* mice.** Mice were intraperitoneally (*i.p*) injected with BrdU and BrdU incorporation in T-cells were examined by flow-cytometry 16 hours later. Scatter plots showing percentages of BrdU<sup>+</sup> T-cells in the indicated populations. Horizontal bars represent the mean ± SEM. Each circle represents one mouse of the indicated genotypes. Data shown represent or calculated from at least three experiments. \*,  $P < 0.05$ ; \*\*,  $P < 0.01$ ; \*\*\*,  $P < 0.001$  determined by unpaired two-tailed Student *t*-test.

Supplementary Fig. S3

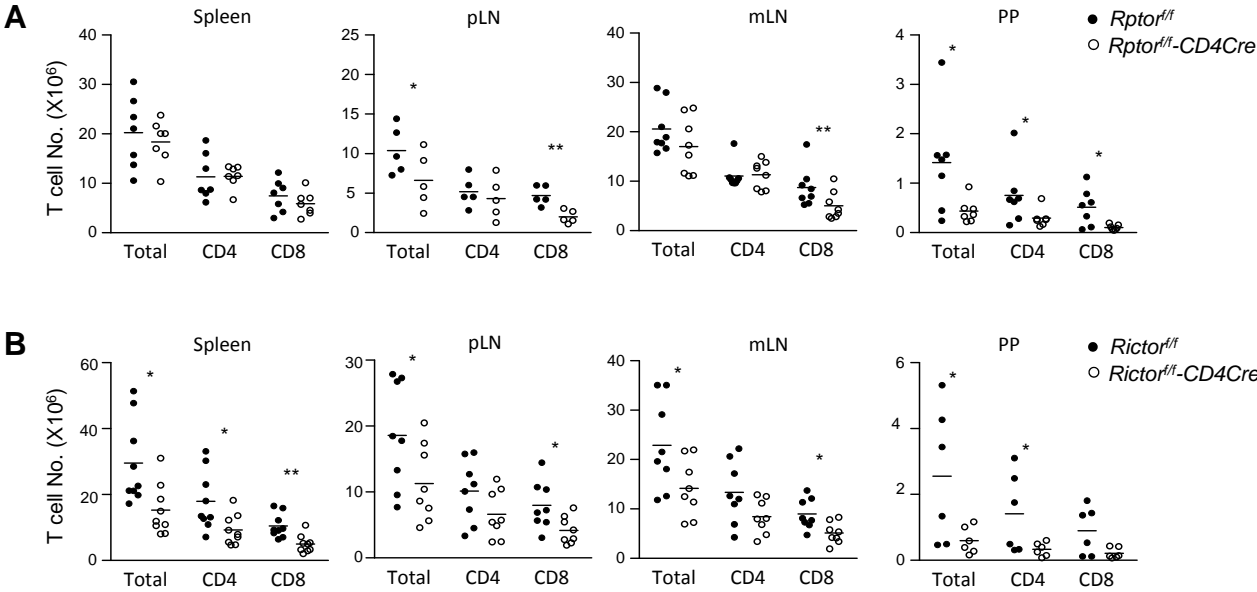

**Figure S3. Effects of mTORC1 and mTORC2 deficiency on T-cell numbers in peripheral lymphoid organs.** Scatter graphs showing the mean  $\pm$  SEM of total T, CD4, and CD8 T-cell numbers in the spleen, pLNs, mLNs, and PPs from *Raptor<sup>fl/fl</sup>* and *Raptor<sup>fl/fl</sup>-CD4Cre* mice (**A**) or *Rictor<sup>fl/fl</sup>* and *Rictor<sup>fl/fl</sup>-CD4Cre* mice (**B**) mice. Data shown are calculated from at least five experiments. \*,  $P < 0.05$ ; \*\*,  $P < 0.01$  determined by unpaired two-tailed Student *t*-test.

Supplementary Fig. S4

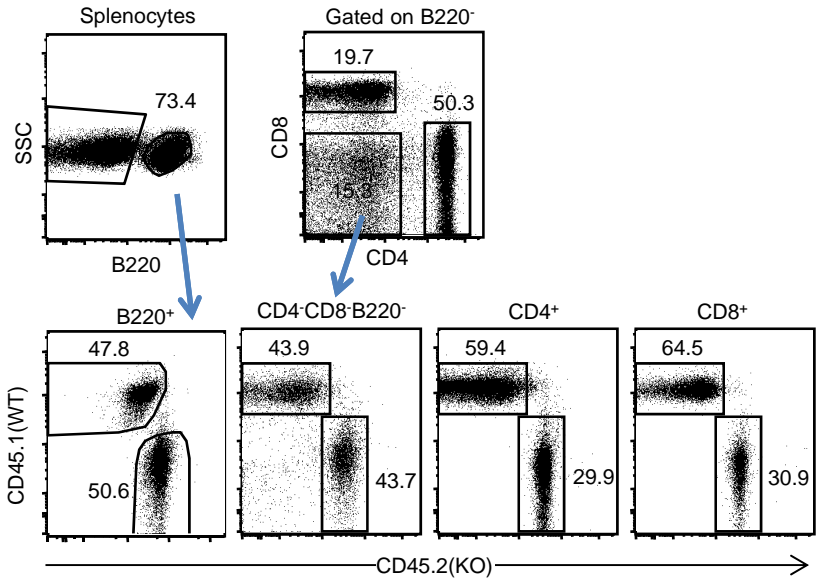

**Figure S4. Role of mTORC1 in splenic T cell homeostasis in mixed bone marrow irradiation chimeric mice.** WT (CD45.1<sup>+</sup>) and *Raptor<sup>fl/fl</sup>-CD4Cre* (CD45.2<sup>+</sup>) BM cells were mixed at a 1:1 ratio and adoptively transferred into sublethally irradiated *TCR-β<sup>-/-</sup>δ<sup>-/-</sup>* mice. Eight weeks later, splenocytes from the chimeric mice were analyzed for B220<sup>+</sup> B cells, CD4 and CD8 T-cell and B220<sup>-</sup>CD4<sup>-</sup>CD8<sup>-</sup> non-T/B cells. Data shown are representative of three experiments.
